# Supplementary material for: Molecular and Environmental Triggering Factors of Pathogenicity of Fusarium oxysporum and F. solani Isolates Involved in the Coffee Corky-Root Disease
Source: MDPI journal article supplement (doi:10.3390/jof7040253), 2021-03-27
Supplement: s1 [file s1]

# Supplementary Materials:

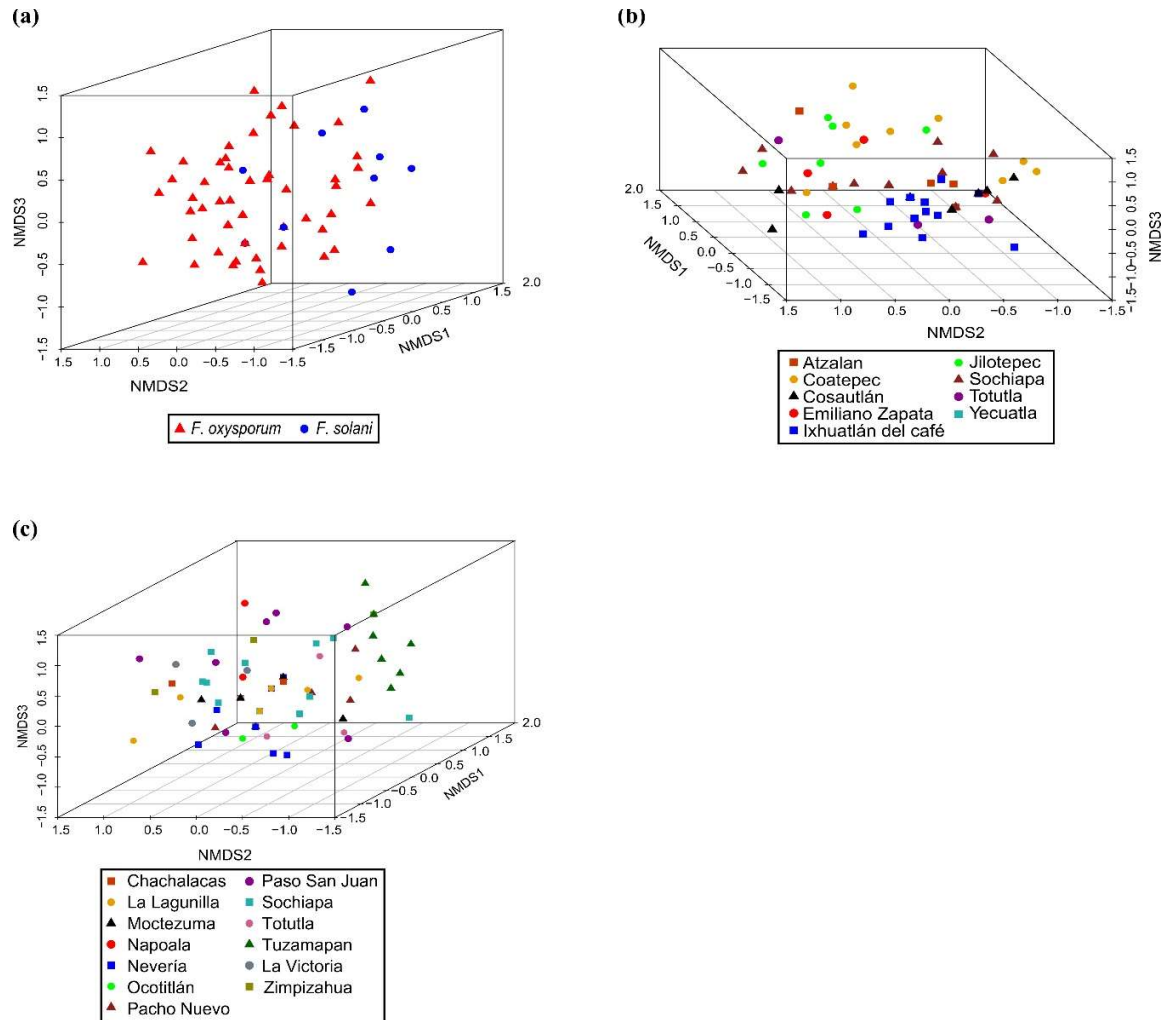

**Figure S1.** Three dimensional non-metric multidimensional scaling (3D-NMDS) ordination of the *Fusarium* isolates associated to coffee corky-root disease. 3D stress value = 0.10. 3D-NMDS plot annotated by: (a) species; (b) municipality; and (c) locality.

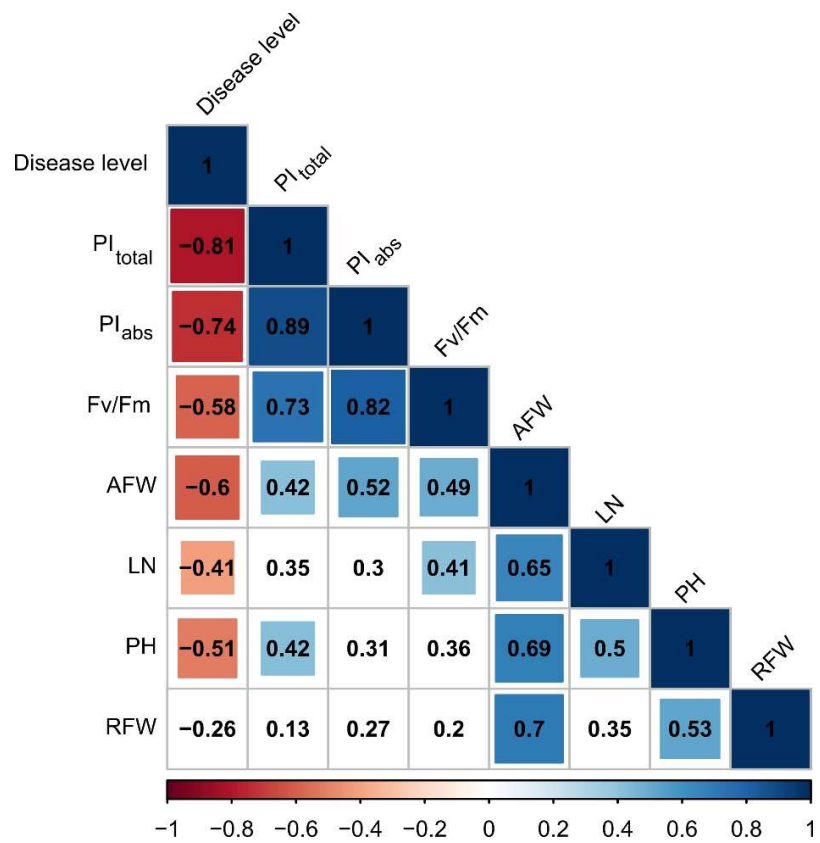

**Figure S2.** Spearman correlation plot between disease damage and physiological parameters of coffee seedlings. The Spearman correlation coefficients are depicted. Statistical significance:  $P < 0.01$ . White squares represent no significant correlations.
